# Supplementary material for: Conformational transition-induced simultaneous fluorescence enhancement of oxytetracycline and rhodamine B under a single excitation wavelength
Source: Royal Society of Chemistry journal article supplement (doi:10.1039/d2dt03305d), 2022-11-19
Supplement: d2dt03305d1.pdf [file d2dt03305d1.pdf]

## Conformational transition-induced simultaneous fluorescence enhancement of oxytetracycline and rhodamine B under a single excitation wavelength

Songlin Zhang<sup>a</sup>, Pengchen Su<sup>a,c</sup>, Long Yu<sup>a</sup>, Yunfei Lu<sup>a,e</sup>, Enyi Ye<sup>b,d</sup>, Zibiao Li<sup>b,d</sup>, Houjuan Zhu<sup>b,\*</sup>, Weijie Hu<sup>a</sup>, Xian Jun Loh<sup>b</sup>, Suhua Wang<sup>a,\*</sup>

<sup>a</sup> Guangdong Provincial Key Laboratory of Petrochemical Pollution Processes and Control, School of Environmental Science and Engineering, Guangdong University of Petrochemical Technology, Maoming, 525000, People's Republic of China

<sup>b</sup> Institute of Materials Research and Engineering, A\*STAR (Agency for Science, Technology and Research), Singapore 138634, Singapore

<sup>c</sup> Department of Chemical Engineering, Hebei Petroleum University of Technology, Chengde, 067000, People's Republic of China

<sup>d</sup> Institute of Sustainability for Chemicals, Energy and Environment (ISCE2) A\*STAR (Agency for Science, Technology and Research) Singapore 138634, Singapore

<sup>e</sup> Beijing Key Laboratory of Materials Utilization of Nonmetallic Minerals and Solid Wastes, National Laboratory of Mineral Materials, School of Materials Science and Technology, China University of Geosciences, Beijing 100083, People's Republic of China

\*Corresponding author: Suhua Wang: [wangsh@gdupt.edu.cn](mailto:wangsh@gdupt.edu.cn); Houjuan Zhu: [zhu\\_houjuan@imre.a-star.edu.sg](mailto:zhu_houjuan@imre.a-star.edu.sg)

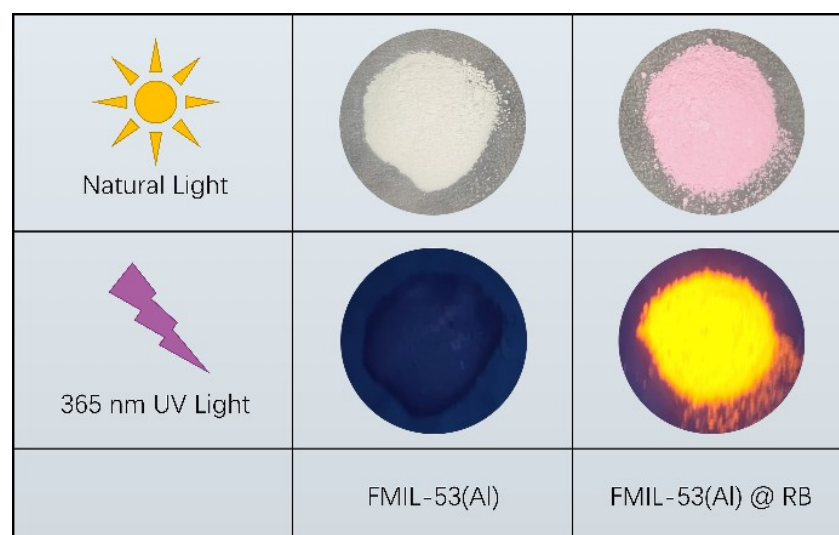

**Figure S1.** Visual comparison of FMIL-53(Al) and FMIL-53(Al)@RB in natural light and 365 nm UV lamp.

**Table S1.** Comparison of the sensing mode and sensitivity of FMIL-53(Al)@RB for OTC detection with other reported sensors.

| Material Type      | Complex                                                                       | Sensing mode          | Detection Limit                      | Reference     |
|--------------------|-------------------------------------------------------------------------------|-----------------------|--------------------------------------|---------------|
| MOFs               | FMIL-53(Al)                                                                   | Turn-on               | 0.94 nM (4.35 nM)                    | 1 (This Work) |
|                    | FMIL-53(Al)@RB                                                                | Dual-emissive turn-on | 3.59 nM and 2.79 nM                  | This Work     |
|                    | AuCuNCs@ZIF-8                                                                 | Ratiometric           | 4.8 nM                               | 2             |
|                    | Al-MOF@Mo/Zn-MOF                                                              | Turn-off              | 0.58 nM                              | 3             |
|                    | RhB@ZIF-8                                                                     | Turn-on               | 0.14 $\mu$ M                         | 4             |
|                    | FSS@ZIF-8                                                                     | Turn-on               | 0.16 $\mu$ M                         | 4             |
|                    | ZIF-8/NH <sub>2</sub> -MIL-53(Al)                                             | Turn-off              | 1.2 $\mu$ g L <sup>-1</sup> (2.6 nM) | 5             |
|                    | NH <sub>2</sub> -MIL-53(Al)                                                   | Turn-off              | 62.05 nM                             | 6             |
|                    | [Tb(HL)L(H <sub>2</sub> O)]nc                                                 | Turn-off              | 1.95 nM                              | 7             |
|                    | FHBA@ZIF-8                                                                    | Turn-on               | 30 nM                                | 8             |
| Carbon Dots        | CDs                                                                           | Ratiometric           | 0.41 $\mu$ M                         | 9             |
|                    | C-CDs                                                                         | Turn-off              | 0.05 $\mu$ M                         | 10            |
|                    | S, N-CDs                                                                      | Ratiometric           | 0.26 $\mu$ M                         | 11            |
|                    | ON-CQDs                                                                       | Turn-off              | 0.973 $\mu$ M                        | 12            |
|                    | WN-CQDs                                                                       | Turn-off              | 0.077 $\mu$ M                        | 12            |
|                    | CDs-H <sub>2</sub> O <sub>2</sub> -Fe <sub>3</sub> O <sub>4</sub> MNPs System | Turn-off              | 9.5 nM                               | 13            |
|                    | CDs [Phthalic acid + Ethylenediamine]                                         | Turn-off              | 36 nM                                | 14            |
|                    | CDs [tobacco]                                                                 | Turn-off              | 6.06 nM                              | 15            |
|                    | CD@AMP/Eu NCPs                                                                | Ratiometric           | 25 nM                                | 16            |
|                    | SiCDs@mMIPs-cit-Eu                                                            | Ratiometric           | 16 nM                                | 17            |
|                    | SiNPs                                                                         | Ratiometric           | 0.18 $\mu$ M                         | 18            |
| Metal Nanoclusters | PEI-Pd NCs                                                                    | Turn-off              | 22 nM                                | 19            |
|                    | SiO <sub>2</sub> /Ag@FMIPs                                                    | Turn-off              | 5.38 nM                              | 20            |
|                    | LTN@AuNCs                                                                     | Turn-on               | 0.3 $\mu$ M                          | 21            |
|                    | AC@Au-Cit-Eu                                                                  | Turn-on               | 11.2 nM                              | 22            |
|                    | Eu(III)-CTACl-EDTA micelles system                                            | Turn-on               | 3-7 ng/g                             | 23            |
|                    | Eu(III)-cetyltrimethylammonium chloride-EDTA micelles                         | Turn-on               | 8 ng/g                               | 24            |

## References

1. Su, P.; Yu, L.; Ai, Y.; Zhang, S.; Ge, H.; Bu, Y.; Huang, D.; Wang, X.; Wang, S., Conformational fixation induced fluorescence turn-on of oxytetracycline coordinated on aluminum-based metal-organic frameworks for ultrasensitive sensing application. *Sens. Actuators, B* **2022**, *368*, 132043.
2. Khataee, A.; Jalili, R.; Dastborhan, M.; Karimi, A.; Ebadi Fard Azar, A., Ratiometric visual detection of tetracycline residues in milk by framework-enhanced fluorescence of gold and copper nanoclusters. *Spectrochim. Acta, Part A* **2020**, *242*, 118715.
3. Li, C.; Yang, W.; Zhang, X.; Han, Y.; Tang, W.; Yue, T.; Li, Z., A 3D hierarchical dual-metal-organic framework heterostructure up-regulating the pre-concentration effect for ultrasensitive fluorescence detection of tetracycline antibiotics. *J. Mater. Chem. C* **2020**, *8* (6), 2054-2064.
4. Zhang, Y.-Q.; Wu, X.-H.; Mao, S.; Tao, W.-Q.; Li, Z., Highly luminescent sensing for nitrofurans and tetracyclines in water based on zeolitic imidazolate framework-8 incorporated with dyes. *Talanta* **2019**, *204*, 344-352.
5. Li, C.; Zhang, X.; Wen, S.; Xiang, R.; Han, Y.; Tang, W.; Yue, T.; Li, Z., Interface engineering of zeolite imidazolate framework-8 on two-dimensional Al-metal-organic framework nanoplates enhancing performance for simultaneous capture and sensing tetracyclines. *J. Hazard. Mater.* **2020**, *395*, 122615.
6. Li, C.; Zhu, L.; Yang, W.; He, X.; Zhao, S.; Zhang, X.; Tang, W.; Wang, J.; Yue, T.; Li, Z., Amino-Functionalized Al-MOF for Fluorescent Detection of Tetracyclines in Milk. *J. Agric. Food Chem.* **2019**, *67* (4), 1277-1283.
7. Li, C.; Zeng, C.; Chen, Z.; Jiang, Y.; Yao, H.; Yang, Y.; Wong, W.-T., Luminescent lanthanide metal-organic framework test strip for immediate detection of tetracycline antibiotics in water. *J. Hazard. Mater.* **2020**, *384*, 121498.
8. Sun, P.; Yang, D.; Li, J.; Zhang, Y., Aggregation-induced emission of 4-formyl-3-hydroxybenzoic acid for the ratiometric fluorescence detection of tetracycline antibiotics. *Dyes Pigm.* **2022**, *197*, 109841.
9. Fu, Y.; Huang, L.; Zhao, S.; Xing, X.; Lan, M.; Song, X., A carbon dot-based fluorometric probe for oxytetracycline detection utilizing a Förster resonance energy transfer mechanism. *Spectrochim. Acta, Part A* **2021**, *246*, 118947.

10. Wang, Y.; Liu, Y.; Zhao, L.; Sun, L.; Zhao, X.; Xia, Y.,  $\kappa$ -Carrageenan-derived carbon dots for highly selective and sensitive detection of  $\text{Fe}^{3+}$  and oxytetracycline. *J. Mater. Sci.* **2021**, *56* (2), 1272-1285.
11. Xing, X.; Huang, L.; Zhao, S.; Xiao, J.; Lan, M., S,N-Doped carbon dots for tetracyclines sensing with a fluorometric spectral response. *Microchem. J.* **2020**, *157*, 105065.
12. Gao, R.; Wu, Z.; Wang, L.; Liu, J.; Deng, Y.; Xiao, Z.; Fang, J.; Liang, Y., Green Preparation of Fluorescent Nitrogen-Doped Carbon Quantum Dots for Sensitive Detection of Oxytetracycline in Environmental Samples. *Nanomaterials* **2020**, *10* (8), 1561.
13. Wang, Y.; Ni, P.; Jiang, S.; Lu, W.; Li, Z.; Liu, H.; Lin, J.; Sun, Y.; Li, Z., Highly sensitive fluorometric determination of oxytetracycline based on carbon dots and  $\text{Fe}_3\text{O}_4$  MNPs. *Sens. Actuators, B* **2018**, *254*, 1118-1124.
14. Liu, Y.; Liu, B.; Huang, P.; Wu, F.-Y.; Ma, L., Concentration-dependent photoluminescence carbon dots for visual recognition and detection of three tetracyclines. *Anal. Bioanal. Chem.* **2021**, *413* (9), 2565-2575.
15. Miao, H.; Wang, Y.; Yang, X., Carbon dots derived from tobacco for visually distinguishing and detecting three kinds of tetracyclines. *Nanoscale* **2018**, *10* (17), 8139-8145.
16. Chen, L.; Xu, H.; Wang, L.; Li, Y.; Tian, X., Portable ratiometric probe based on the use of europium(III) coordination polymers doped with carbon dots for visual fluorometric determination of oxytetracycline. *Microchim. Acta* **2020**, *187* (2), 125.
17. Jia, L.; Xu, Z.; Chen, R.; Chen, X.; Xu, J., Dual-Channel Probe of Carbon Dots Cooperating with Lanthanide Complex Employed for Simultaneously Distinguishing and Sequentially Detecting Tetracycline and Oxytetracycline. *Nanomaterials* **2022**, *12* (1), 128.
18. Xu, N.; Yuan, Y.; Yin, J.-H.; Wang, X.; Meng, L., One-pot hydrothermal synthesis of luminescent silicon-based nanoparticles for highly specific detection of oxytetracycline via ratiometric fluorescent strategy. *RSC Adv.* **2017**, *7* (76), 48429-48436.
19. Wen, W.; Li, Z.; Wang, X.; Du, X.; Wen, G.; Li, L., Fluorescent PEI@Pd nanoclusters: facile synthesis and application. *RSC Adv.* **2021**, *11* (53), 33202-33207.
20. Wang, J.; Zou, L.; Xu, J.; Zhang, R.; Zhang, H., Molecularly imprinted fluoroprobes doped with Ag nanoparticles for highly selective detection of oxytetracycline in real samples. *Anal. Chim. Acta* **2021**, *1161*, 338326.

21. Zhang, X.; Qiao, J.; Liu, W.; Qi, L., Boosting the peroxidase-like activity of gold nanoclusters for the colorimetric detection of oxytetracycline in rat serum. *Analyst* **2021**, *146* (16), 5061-5066.
22. Xu, J.; Chen, R.; Jia, L.; Shen, X.; Zhao, T.; Su, L.; Guo, S.; Ma, T.; Zhang, B.; Guo, Q.; Ge, Z.; Zhu, T., Janus applications: A multifunctional nano-platform with integrated visual detection and photodegradation of tetracyclines. *Appl. Surf. Sci.* **2019**, *484*, 1-10.
23. Chen, G.; Schneider, M. J.; Darwish, A. M.; Lehotay, S. J.; Freeman, D. W., Europium-sensitized luminescence determination of oxytetracycline in catfish muscle. *Talanta* **2004**, *64* (1), 252-257.
24. Schneider, M. J.; Chen, G., Time-Resolved Luminescence Screening Assay for Tetracyclines in Chicken Muscle. *Anal. Lett.* **2004**, *37* (10), 2067-2078.
